# Supplementary material for: Development and comparison of regression models for the determination of quality parameters in margarine spread samples using NIR spectroscopy
Source: Royal Society of Chemistry journal article supplement (doi:10.1039/c8ay01055b), 2018-01-01

## Electronic supplementary material

### Development and comparison of regression models for determination of quality parameters in margarine spread samples using NIR spectroscopy

Anita Rácz<sup>1,\*</sup>, Marietta Fodor<sup>2</sup>, Károly Héberger<sup>1</sup>

<sup>1</sup> Plasma Chemistry Research Group, Research Centre for Natural Sciences, Hungarian Academy of Sciences, H-1117 Budapest XI., Magyar tudósok körútja 2, Hungary

<sup>2</sup> Szent István University, Faculty of Food Science, Department of Applied Chemistry, H-1118 Budapest XI., Villányi út 29-43, Hungary

\* E-mail address: racz.anita@ttk.mta.hu

**Table S1:** Range and average values of the reference measurements for the four cases.

| Spectral Mode | Range       |                  | Average |                  |
|---------------|-------------|------------------|---------|------------------|
|               | Fat (%)     | Dry material (%) | Fat (%) | Dry material (%) |
| Reflectance   | 19.3 - 61.3 | 39.7 - 80.7      | 39.2    | 60.5             |
| Transmission  | 17.7 - 57.5 | 19.5 - 59.7      | 35.3    | 38.1             |

**Table S2:** Summary of the performance parameters of the models for the four datasets. Average values were calculated in all cases. RMSEC, RMSECV and RMSEP values are in %. Y means the measured content (dependent variable). RSD is the relative standard deviance in %.

| Spectral mode | Y            | R <sup>2</sup> | Q <sup>2</sup> | RMSEC  | RMSECV | LVs | Q <sup>2</sup> ext | RMSEP  | RSD (RMSEP, %) |
|---------------|--------------|----------------|----------------|--------|--------|-----|--------------------|--------|----------------|
| Reflectance   | Fat          | 0.9846         | 0.9772         | 1.6214 | 1.9955 | 4   | 0.7735             | 3.1525 | 20.30          |
|               | Dry material | 0.9809         | 0.9730         | 1.8140 | 2.2245 | 5   | 0.8824             | 2.4370 | 11.53          |
| Transmission  | Fat          | 0.9543         | 0.9245         | 2.3378 | 2.8545 | 5   | 0.8507             | 3.3803 | 61.75          |
|               | Dry material | 0.9704         | 0.9488         | 1.8676 | 2.2399 | 4   | 0.9199             | 2.8145 | 62.66          |

**Figure S1:** One example of the evaluated regression models. PLS regression with interval selection (50 splits) was used. The number of PLS components were 5 and random 5-fold CV was applied. Predicted Y values were plotted against the reference Y values. Blue dots are assigned to the calibration and red dots are assigned to the validation set.

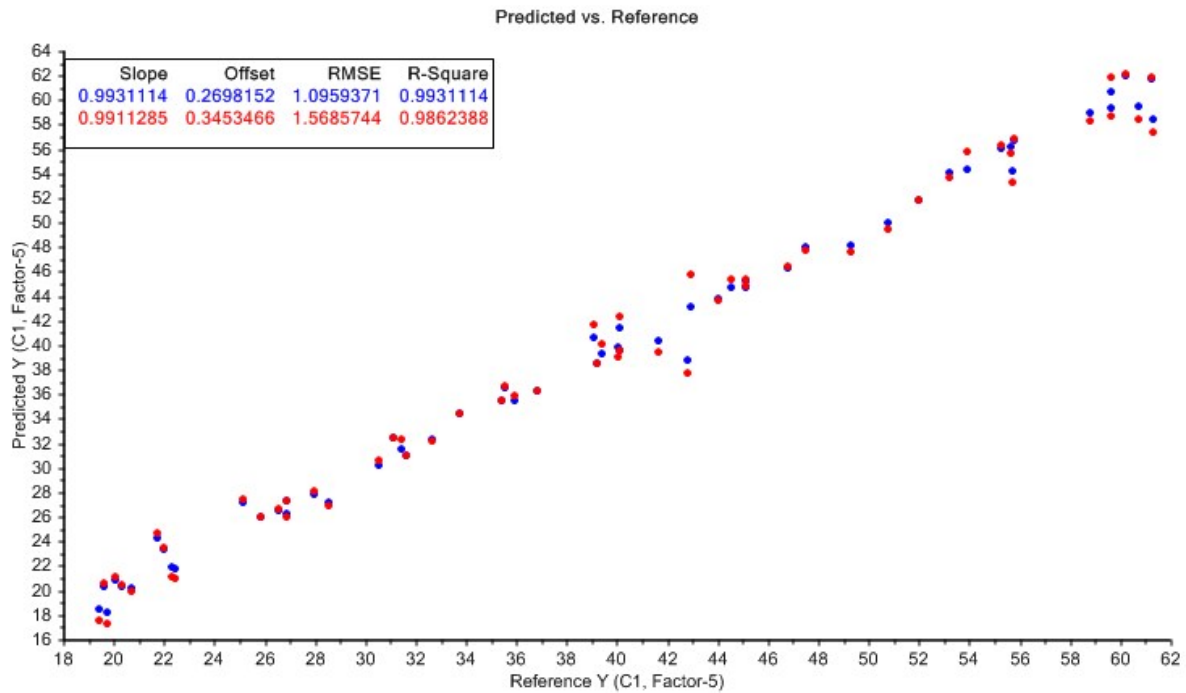

Supplement: c8ay01055b1.pdf [file c8ay01055b1.pdf]
